# Supplementary material
Source: HighWire-hosted journal article supplement (https://heart.bmj.com/content/108/17/1401)
Supplement: inline-supplementary-material-3 [file inline-supplementary-material-3.pdf]

## SUPPLEMENTAL FILE

## Supplemental Tables

**Table S1 – Multivariable Cox regression analysis showing the association between each individual variable and all-cause mortality and the combined endpoint of all-cause mortality and AVR.**

|                                  | All-cause mortality    |         | AVR or all-cause mortality |         |
|----------------------------------|------------------------|---------|----------------------------|---------|
|                                  | HR (95% CI)            | p-value | HR (95% CI)                | p-value |
|                                  | Univariable analysis   |         | Univariable analysis       |         |
| Age, years                       | 1.032 (1.022 – 1.043)  | <0.001  | 1.002 (0.995 – 1.009)      | 0.625   |
| Male sex                         | 1.235 (1.021 – 1.493)  | 0.030   | 1.526 (1.312 – 1.775)      | <0.001  |
| Diabetes mellitus                | 1.565 (1.289 – 1.900)  | <0.001  | 1.189 (1.015 – 1.392)      | 0.032   |
| Arterial hypertension            | 0.879 (0.672 – 1.148)  | 0.344   | 0.905 (0.733 – 1.116)      | 0.349   |
| Dyslipidemia                     | 0.698 (0.555 – 0.878)  | 0.002   | 0.826 (0.686 – 0.996)      | 0.045   |
| Coronary artery disease          | 0.888 (0.721 – 1.093)  | 0.263   | 1.159 (0.983 – 1.366)      | 0.078   |
| Previous myocardial infarction   | 0.917 (0.700 – 1.201)  | 0.531   | 0.875 (0.702 – 1.092)      | 0.239   |
| Atrial fibrillation              | 1.114 (0.905 – 1.370)  | 0.309   | 1.006 (0.850 – 1.191)      | 0.945   |
| eGFR, ml/min/1.73m <sup>2</sup>  | 0.986 (0.983 – 0.989)  | <0.001  | 0.995 (0.993 – 0.997)      | <0.001  |
| NYHA III to IV                   | 1.422 (1.123 – 1.801)  | 0.003   | 1.863 (1.543 – 2.249)      | <0.001  |
| LVEF                             | 0.982 (0.969 – 0.996)  | 0.009   | 0.984 (0.974 – 0.995)      | 0.006   |
| Aortic valve area                | 0.887 (0.471 – 1.670)  | 0.710   | 0.412 (0.248 – 0.683)      | 0.001   |
| AVR as a time dependent variable | 0.737 (0.567 – 0.957)  | 0.022   | -                          |         |
| Normal diastolic function        | <i>Reference group</i> |         | <i>Reference group</i>     |         |
| Indeterminate diastolic function | 1.125 (0.863 – 1.465)  | 0.384   | 1.066 (0.868 – 1.308)      | 0.543   |
| Diastolic dysfunction            | 1.368 (1.085 – 1.725)  | 0.008   | 1.241 (1.035 – 1.488)      | 0.020   |

AVR = aortic valve replacement; eGFR = estimated glomerular filtration rate; LVEF = left ventricular ejection fraction; NYHA = New York Heart Association.

**Table S2 - Univariable and multivariable Cox regression analysis for all-cause mortality and the combined endpoint of all-cause mortality and AVR according to individual variables to assess left ventricular diastolic dysfunction.**

|                         | All-cause mortality             |         | AVR or all-cause mortality       |         |
|-------------------------|---------------------------------|---------|----------------------------------|---------|
|                         | HR (95% CI)                     | p-value | HR (95% CI)                      | p-value |
|                         | <b>Univariable analysis</b>     |         | <b>Univariable analysis</b>      |         |
| e' (average)            | 0.970 (0.929 – 1.013)           | 0.174   | 0.955 (0.922 – 0.991)            | 0.013   |
| E/e'                    | 1.012 (1.002 – 1.021)           | 0.014   | 1.006 (0.998 – 1.014)            | 0.114   |
| TR velocity, m/s        | 1.703 (1.422 – 2.040)           | <0.001  | 1.118 (0.963 – 1.297)            | 0.142   |
| LAVi, ml/m <sup>2</sup> | 1.006 (1.001 – 1.010)           | 0.009   | 1.004 (1.000 – 1.007)            | 0.034   |
|                         | <b>Multivariable analysis *</b> |         | <b>Multivariable analysis **</b> |         |
| e' (average)            | 0.994 (0.958 – 1.031)           | 0.728   | 0.972 (0.945 – 1.001)            | 0.056   |
| E/e'                    | 1.007 (0.996 – 1.018)           | 0.214   | 1.006 (0.997 – 1.014)            | 0.190   |
| TR velocity, m/s        | 1.422 (1.171 – 1.726)           | <0.001  | 1.106 (0.945 – 1.293)            | 0.210   |
| LAVi, ml/m <sup>2</sup> | 1.008 (1.002 – 1.013)           | 0.004   | 1.004 (1.000 – 1.008)            | 0.058   |

\*Adjusted for AVR as a time-dependent covariate, age, sex, diabetes mellitus, arterial hypertension, dyslipidemia, coronary artery disease, previous myocardial infarction, atrial fibrillation, estimated glomerular filtration rate, New York Heart Association functional class III to IV, left ventricular ejection fraction and aortic valve area.

\*\*Adjusted for age, sex, diabetes mellitus, arterial hypertension, dyslipidemia, coronary artery disease, previous myocardial infarction, atrial fibrillation, estimated glomerular filtration rate, New York Heart Association functional class III to IV, left ventricular ejection fraction, and aortic valve area.

AVR = aortic valve replacement, LAVi = left atrial volume index; TR = tricuspid regurgitation velocity.

**Supplemental figures****Figure S1 – Study flow chart**

LA = left atrial; LVEF = left ventricular ejection fraction; TR = tricuspid regurgitation.

**Figure S2 – Kaplan-Meier survival curve for all-cause mortality, censored for AVR, according to the classification of LV diastolic function.**

AVR = aortic valve replacement; LV = left ventricular.
