# Supplementary material
Source: HighWire-hosted journal article supplement (https://heart.bmj.com/content/108/17/1401)

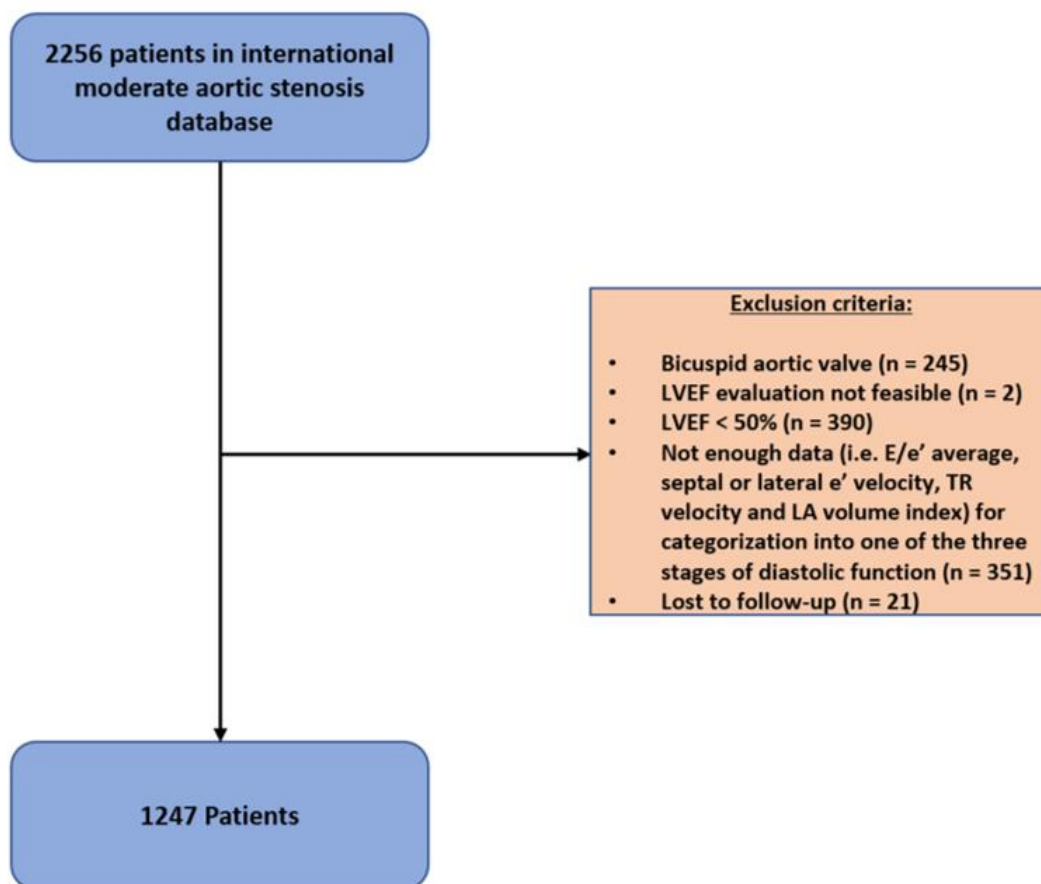

Supplement: inline-supplementary-material-1 [file inline-supplementary-material-1.pdf]

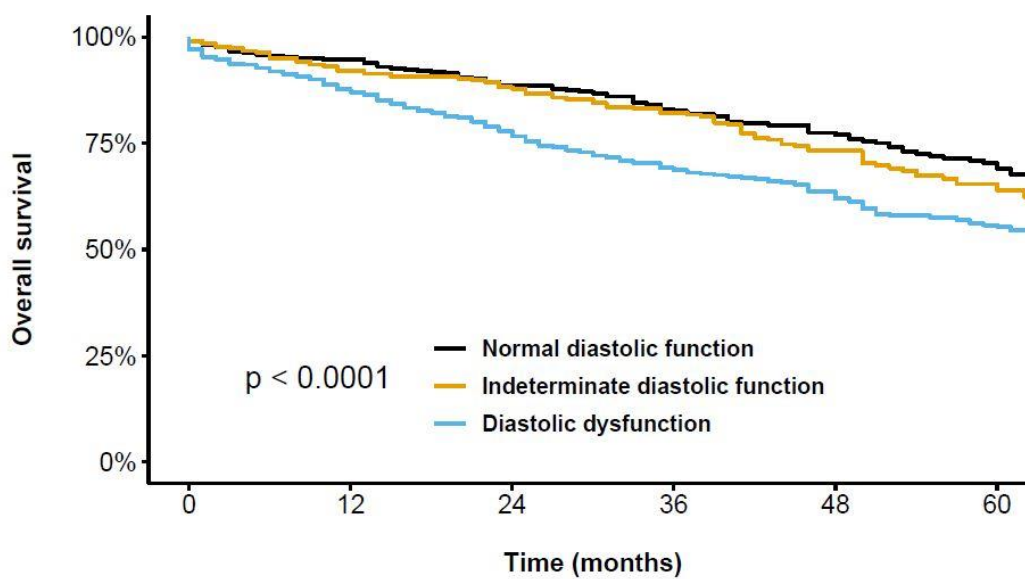

## Number at risk

|   |     |     |     |     |     |     |
|---|-----|-----|-----|-----|-----|-----|
| — | 396 | 329 | 266 | 212 | 168 | 115 |
| — | 316 | 255 | 216 | 177 | 128 | 94  |
| — | 535 | 409 | 316 | 255 | 197 | 147 |

Supplement: inline-supplementary-material-2 [file inline-supplementary-material-2.pdf]
